# Supplementary material for: Impacts of Subtype on Clinical Feature and Outcome of Male Breast Cancer: Multicenter Study in Korea (KCSG BR16-09)
Source: PubMed Central journal article supplement — Cancer Res Treat. 2022 Mar 24;55(1):123–35. doi: 10.4143/crt.2021.1561 (PMC9873331; doi:10.4143/crt.2021.1561), 2022-03-24
Supplement: crt-2021-1561-S1-Table.pdf [file crt-2021-1561-S1-Table.pdf]

**S1 Table.** Patient characteristics

|                               | No. (%)          |
|-------------------------------|------------------|
| Family history of cancer      |                  |
| No                            | 199 (80.2)       |
| Yes                           | 26 (10.5)        |
| Not assessed                  | 23 (9.3)         |
| Prior history of other cancer |                  |
| No                            | 237 (95.6)       |
| Yes                           | 11 (4.4)         |
| BMI, median (range)           | 23.7 (13.8-42.1) |
| Marriage                      |                  |
| married                       | 189 (76.2)       |
| single                        | 27 (10.9)        |
| Not assessed                  | 32 (12.9)        |
| Alcohol                       |                  |
| No                            | 110 (44.4)       |
| Yes                           | 92 (37.1)        |
| Not assessed                  | 46 (18.5)        |
| Smoking                       |                  |
| Never                         | 110 (44.4)       |
| current                       | 57 (23.0)        |
| ex-smoker                     | 49 (19.8)        |
| Not assessed                  | 32 (12.9)        |
| History of liver disease      |                  |
| No                            | 192 (77.4)       |
| Liver cirrhosis               | 1 (0.4)          |
| Viral hepatitis               | 6 (2.4)          |
| Not assessed                  | 49 (19.8)        |

BMI, body mass index.
