# Supplementary material for: Impacts of Subtype on Clinical Feature and Outcome of Male Breast Cancer: Multicenter Study in Korea (KCSG BR16-09)
Source: PubMed Central journal article supplement — Cancer Res Treat. 2022 Mar 24;55(1):123–35. doi: 10.4143/crt.2021.1561 (PMC9873331; doi:10.4143/crt.2021.1561), 2022-03-24
Supplement: crt-2021-1561-S2-Table.pdf [file crt-2021-1561-S2-Table.pdf]

**S2 Table.** Patient characteristics according to adjuvant chemotherapy

|                            | Adjuvant<br>chemotherapy (-) | Adjuvant<br>chemotherapy (+) | p-value |
|----------------------------|------------------------------|------------------------------|---------|
| No. of patients            | 107                          | 108                          |         |
| Age, median (range, mo)    | 70.0 (32-92)                 | 59.5 (30-102)                | <0.001  |
| ECOG                       |                              |                              | <0.001  |
| 0                          | 24 (22.4)                    | 53 (49.1)                    |         |
| 1                          | 58 (54.2)                    | 38 (35.2)                    |         |
| 2                          | 2 (1.9)                      | 0                            |         |
| Not assessed               | 23 (21.5)                    | 17 (15.7)                    |         |
| Laterality                 |                              |                              | 0.439   |
| Unilateral, right          | 49 (45.8)                    | 47 (43.5)                    |         |
| Unilateral, left           | 50 (46.7)                    | 56 (51.9)                    |         |
| Bilateral                  | 0                            | 1 (0.9)                      |         |
| Not assessed               | 8 (7.5)                      | 4 (3.7)                      |         |
| Multiplicity               |                              |                              | 0.100   |
| No                         | 95 (88.8)                    | 94 (87.0)                    |         |
| Yes                        | 2 (1.9)                      | 8 (7.4)                      |         |
| Not assessed               | 10 (9.3)                     | 6 (5.6)                      |         |
| Histology                  |                              |                              | 0.123   |
| Invasive ductal carcinoma  | 79 (73.8)                    | 95 (88.8)                    |         |
| Invasive lobular carcinoma | 0                            | 1 (0.9)                      |         |
| Mucinous carcinoma         | 4 (3.7)                      | 4 (3.7)                      |         |
| Papillary carcinoma        | 11 (10.3)                    | 2 (1.9)                      |         |
| Cribriform carcinoma       | 2 (1.9)                      | 1 (0.9)                      |         |
| Sarcoma                    | 3 (2.8)                      | 0                            |         |
| Others                     | 2 (1.9)                      | 1 (0.9)                      |         |
| Carcinoma                  | 1 (0.9)                      | 1 (0.9)                      |         |
| Not assessed               | 5 (4.7)                      | 3 (2.8)                      |         |
| Grade                      |                              |                              | <0.001  |
| Well                       | 22 (20.6)                    | 13 (12.0)                    |         |
| Moderate                   | 36 (33.6)                    | 59 (54.6)                    |         |
| Poor                       | 11 (10.3)                    | 20 (18.5)                    |         |
| Not assessed               | 38 (35.5)                    | 16 (14.8)                    |         |
| Stage                      |                              |                              | <0.001  |
| I                          | 49 (45.8)                    | 19 (17.6)                    |         |
| II                         | 43 (40.2)                    | 54 (50.0)                    |         |
| III                        | 9 (8.4)                      | 31 (28.7)                    |         |
| Not assessed               | 6 (5.6)                      | 4 (3.7)                      |         |
| T category                 |                              |                              | 0.171   |
| Tis                        | 1 (0.9)                      | 1 (0.9)                      |         |
| T1                         | 58 (54.2)                    | 52 (48.1)                    |         |
| T2                         | 40 (37.4)                    | 46 (42.6)                    |         |
| T3                         | 0                            | 5 (4.6)                      |         |
| T4                         | 2 (1.9)                      | 2 (1.9)                      |         |
| Not assessed               | 6 (5.6)                      | 2 (1.9)                      |         |
| N category                 |                              |                              | <0.001  |
| 0                          | 71 (66.4)                    | 33 (30.6)                    |         |
| 1                          | 15 (14.0)                    | 41 (38.0)                    |         |

|                               |                 |                  |       |
|-------------------------------|-----------------|------------------|-------|
| 2                             | 6 (5.6)         | 13 (12.0)        |       |
| 3                             | 2 (1.9)         | 15 (13.9)        |       |
| Not assessed                  | 13 (12.1)       | 6 (5.6)          |       |
| Lymphatic invasion            |                 |                  | 0.002 |
| No                            | 54 (50.5)       | 39 (36.1)        |       |
| Yes                           | 22 (20.6)       | 47 (43.5)        |       |
| Not assessed                  | 31 (29.0)       | 22 (20.4)        |       |
| Vascular invasion             |                 |                  | 0.047 |
| No                            | 59 (55.1)       | 58 (53.7)        |       |
| Yes                           | 15 (14.0)       | 28 (25.9)        |       |
| Not assessed                  | 33 (30.8)       | 22 (20.4)        |       |
| Perineural invasion           |                 |                  | 0.049 |
| No                            | 50 (46.7)       | 62 (57.4)        |       |
| Yes                           | 4 (3.7)         | 9 (8.3)          |       |
| Not assessed                  | 53 (49.5)       | 37 (34.3)        |       |
| ER                            |                 |                  | 0.044 |
| Negative                      | 8 (7.5)         | 4 (3.7)          |       |
| Positive                      | 87 (81.3)       | 100 (92.6)       |       |
| Not assessed                  | 12 (11.2)       | 4 (3.7)          |       |
| PR                            |                 |                  | 0.143 |
| Negative                      | 18 (16.8)       | 15 (13.9)        |       |
| Positive                      | 77 (72.0)       | 88 (81.5)        |       |
| Not assessed                  | 12 (11.2)       | 5 (4.6)          |       |
| HER2                          |                 |                  | 0.196 |
| 0                             | 49 (45.8)       | 43 (39.8)        |       |
| 1+                            | 19 (17.8)       | 22 (20.4)        |       |
| 2+                            | 13 (12.1)       | 23 (21.3)        |       |
| 3+                            | 9 (8.4)         | 11 (10.2)        |       |
| Not assessed                  | 17 (15.9)       | 9 (8.3)          |       |
| Ki-67, median (range)         | 14.1 (7.8-35.0) | 20.0 (10.0-30.0) | 0.352 |
| Classification                |                 |                  | 0.056 |
| HR (+)                        | 80 (74.8)       | 84 (77.8)        |       |
| HER2 (+)                      | 9 (8.4)         | 17 (15.7)        |       |
| TNBC                          | 6 (5.6)         | 3 (2.8)          |       |
| Not assessed                  | 12 (11.2)       | 4 (3.7)          |       |
| Subtype                       |                 |                  | 0.079 |
| Luminal A                     | 30 (28.0)       | 28 (25.9)        |       |
| Luminal B                     | 16 (15.0)       | 27 (25.0)        |       |
| HER2 positive                 | 9 (8.4)         | 17 (15.7)        |       |
| TNBC                          | 6 (5.6)         | 3 (2.8)          |       |
| Not assessed                  | 46 (43.0)       | 33 (30.6)        |       |
| Operation                     |                 |                  | 0.011 |
| MRM                           | 69 (64.5)       | 88 (81.5)        |       |
| Total mastectomy              | 24 (22.4)       | 17 (15.7)        |       |
| BCS                           | 10 (9.3)        | 1 (0.9)          |       |
| Node excision                 | 1 (0.9)         | 1 (0.9)          |       |
| Not assessed                  | 3 (2.8)         | 1 (0.9)          |       |
| LN dissection                 |                 |                  | 0.011 |
| ANLD (axillary LN dissection) | 53 (51.0)       | 78 (72.9)        |       |

|                            |            |            |       |
|----------------------------|------------|------------|-------|
| SLNB (sentinal LN Bx.)     | 34 (32.7)  | 18 (16.8)  |       |
| Not done                   | 9 (8.7)    | 5 (4.7)    |       |
| Not assessed               | 8 (7.7)    | 6 (5.6)    |       |
| Neoadjuvant chemotherapy   |            |            | 0.486 |
| No                         | 101 (94.4) | 105 (97.2) |       |
| Yes                        | 6 (5.6)    | 3 (2.8)    |       |
| Adjuvant Radiation         |            |            | 0.009 |
| No                         | 87 (81.3)  | 68 (63.6)  |       |
| Yes                        | 16 (15.0)  | 35 (32.7)  |       |
| Not assessed               | 4 (3.7)    | 4 (3.7)    |       |
| Adjuvant endocrine therapy |            |            | 0.993 |
| No                         | 12 (12.9)  | 13 (12.7)  |       |
| Yes                        | 78 (83.9)  | 86 (84.3)  |       |
| Not assessed               | 3 (3.2)    | 3 (2.9)    |       |

---

Values are presented as number (%) unless otherwise indicated. ALND, axillary lymph node dissection; BCS, breast conserving surgery; Bx, biopsy; ER, estrogen receptor; HER2, human epidermal growth factor receptor 2; LN, lymph node; MRM, modified radical mastectomy; PR, progesterone receptor; SLNB, sentinel lymph node biopsy; TNBC, triple-negative breast cancer.
