# Supplementary material for: Impacts of Subtype on Clinical Feature and Outcome of Male Breast Cancer: Multicenter Study in Korea (KCSG BR16-09)
Source: PubMed Central journal article supplement — Cancer Res Treat. 2022 Mar 24;55(1):123–35. doi: 10.4143/crt.2021.1561 (PMC9873331; doi:10.4143/crt.2021.1561), 2022-03-24
Supplement: crt-2021-1561-S4-Fig..pdf [file crt-2021-1561-S4-Fig..pdf]

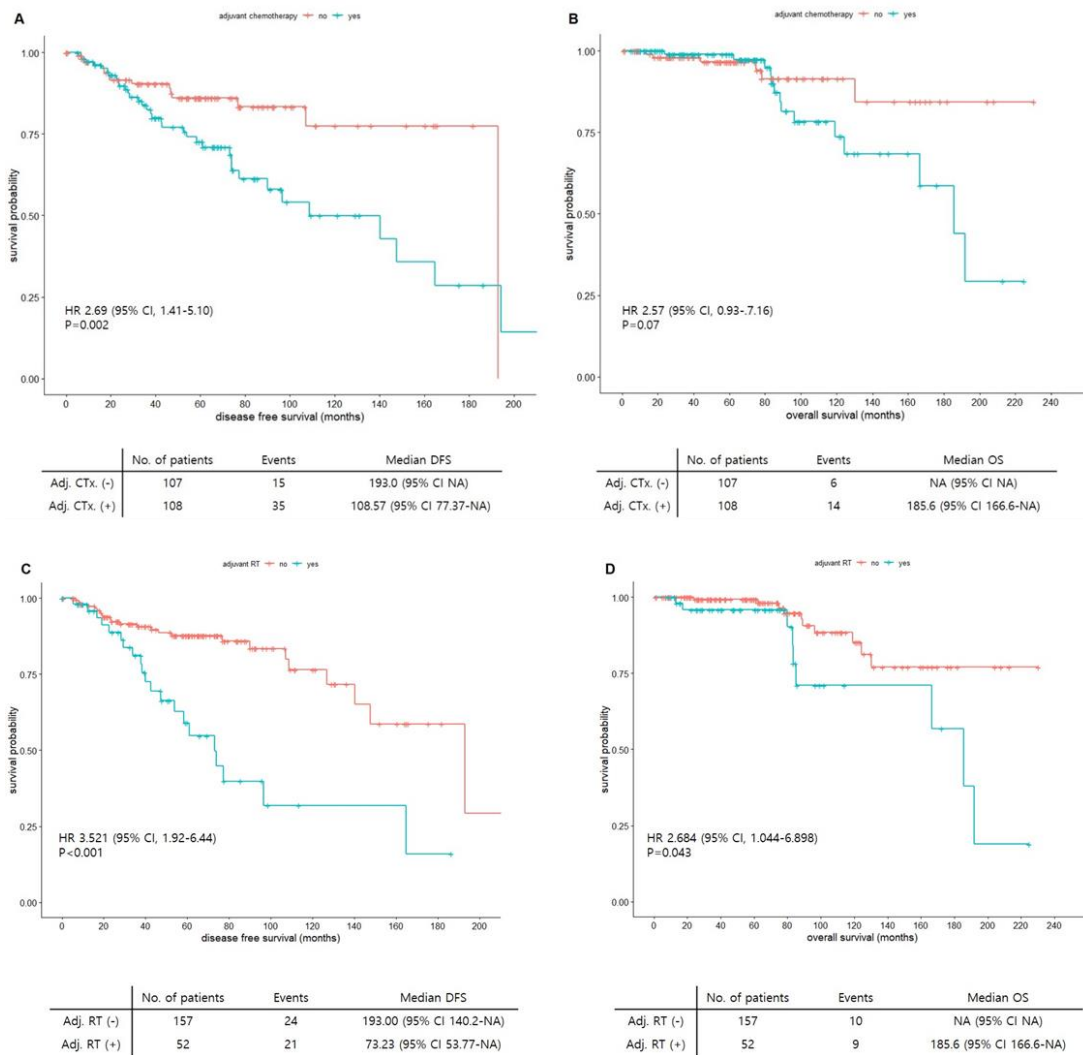

**S4 Fig.** Survival outcomes according to adjuvant chemotherapy or radiotherapy. (A) Disease-free survival according to adjuvant chemotherapy. (B) Overall survival according to adjuvant chemotherapy. (C) Disease-free survival according to adjuvant radiation treatment. (D) Overall survival according to adjuvant radiation treatment. Adj. CTx, adjuvant chemotherapy; Adj. RT, adjuvant radiation therapy; CI, confidence interval; DFS, disease-free survival; HR, hazard ratio; NA, available; OS, overall survival.
