# Supplementary material for: Impacts of Subtype on Clinical Feature and Outcome of Male Breast Cancer: Multicenter Study in Korea (KCSG BR16-09)
Source: PubMed Central journal article supplement — Cancer Res Treat. 2022 Mar 24;55(1):123–35. doi: 10.4143/crt.2021.1561 (PMC9873331; doi:10.4143/crt.2021.1561), 2022-03-24
Supplement: crt-2021-1561-S5-Table.pdf [file crt-2021-1561-S5-Table.pdf]

**S5 Table.** Palliative systemic treatment (yes: n=43, 71.7%, no: n=17, 28.3%)

| First line                 | n=43              | Second line                | n=32             | Third line                 | n=22              | Fourth line                | n=15              | Fifth line                 | n=7              |
|----------------------------|-------------------|----------------------------|------------------|----------------------------|-------------------|----------------------------|-------------------|----------------------------|------------------|
| <b>2010-2019</b>           | <b>20 (46.5)</b>  | <b>2010-2019</b>           | <b>18 (56.3)</b> | <b>2010-2019</b>           | <b>10 (45.5)</b>  | <b>2010-2019</b>           | <b>8 (53.3)</b>   | <b>2010-2019</b>           | <b>6 (85.7)</b>  |
| Doxorubicin                | 1 (2.3)           | Docetaxel                  | 3 (9.4%)         | Weekly paclitaxel          | 1 (4.5%)          | Docetaxel                  | 1 (6.7%)          | Capecitabine               | 1 (14.3%)        |
| Weekly paclitaxel          | 1 (2.3)           | Capecitabine               | 2 (6.3)          | Capecitabine               | 2 (9.1)           | Gemcitabine                | 1 (6.7)           | Gemcitabine                | 2 (28.6)         |
| Paclitaxel                 | 1 (2.3)           | Gemcitabine                | 1 (3.2)          | Eribulin                   | 2 (9.1)           | Vinorelbine                | 1 (6.7)           | CAF/FAC                    | 1 (14.3)         |
| docetaxel                  | 2 (4.7)           | Vinorelbine                | 1 (3.2)          | Gemcitabine-vinorelbine    | 1 (4.5)           | Eribulin                   | 1 (6.7)           | CMF                        | 1 (14.3)         |
| Capecitabine               | 6 (14.0)          | AC                         | 2 (6.3)          | Trastuzumab                | 1 (4.5)           | Gemcitabine-paclitaxel     | 1 (6.7)           | Gemcitabine-vinorelbine    | 1 (14.3)         |
| AC                         | 1 (2.3)           | CMF                        | 1 (3.2)          | Capecitabine-lapatinib     | 1 (4.5)           | Capecitabine-lapatinib     | 2 (13.3)          |                            |                  |
| CAF/FAC                    | 2 (4.7)           | Paclitaxel-carboplatin     | 1 (3.2)          | T-DM1                      | 1 (4.5)           | Irinotecan-cisplatin       | 1 (6.7)           |                            |                  |
| DA                         | 2 (4.7)           | Gemcitabine-cisplatin      | 1 (3.2)          | Irinotecan-capecitabine    | 1 (4.5)           |                            |                   |                            |                  |
| DE                         | 1 (2.3)           | Trastuzumab                | 2 (6.5)          |                            |                   |                            |                   |                            |                  |
| Paclitaxel-carboplatin     | 1 (2.3)           | Capecitabine-lapatinib     | 1 (3.2)          |                            |                   |                            |                   |                            |                  |
| Gemcitabine-vinorelbine    | 1 (2.4)           | Paclitaxel-cisplatin       | 1 (3.2)          |                            |                   |                            |                   |                            |                  |
| THP                        | 1 (2.4)           | Cisplatin                  | 1 (3.2)          |                            |                   |                            |                   |                            |                  |
| Median PFS (months, range) | 5.55 (0.93-20.87) | Median PFS (months, range) | 4.08 (0.2-24.67) | Median PFS (months, range) | 3.83 (0.67-16.57) | Median PFS (months, range) | 4.30 (0.83-15.40) | Median PFS (months, range) | 3.90 (0.30-9.83) |
| <b>2000-2009</b>           | <b>18 (41.9)</b>  | <b>2000-2009</b>           | <b>13 (40.6)</b> | <b>2000-2009</b>           | <b>11 (50)</b>    | <b>2000-2009</b>           | <b>7 (46.7)</b>   | <b>2000-2009</b>           | <b>1 (14.3)</b>  |
| Weekly paclitaxel          | 1 (2.4)           | Paclitaxel                 | 2 (6.5)          | Docetaxel                  | 1 (4.5)           | Capecitabine               | 1 (6.7)           | Capecitabine               | 1 (14.3)         |
| Paclitaxel                 | 2 (4.7)           | Docetaxel                  | 3 (9.4)          | Capecitabine               | 1 (4.5)           | Gemcitabine                | 2 (13.3)          |                            |                  |
| Docetaxel                  | 1 (2.4)           | Capecitabine               | 4 (12.5)         | Gemcitabine                | 2 (9.1)           | Vinorelbine                | 2 (13.3)          |                            |                  |
| Capecitabine               | 2 (4.7)           | AC                         | 1 (3.2)          | AC                         | 1 (4.5)           | Gemcitabine-vinorelbine    | 1 (6.7)           |                            |                  |
| CAF/FAC                    | 3 (6.8)           | Docetaxel-capecitabine     | 1 (3.2)          | DA                         | 1 (4.5)           | Etoposide-cisplatin        | 1 (6.7)           |                            |                  |
| CMF                        | 1 (2.3)           | Gemcitabine-vinorelbine    | 2 (6.5)          | Docetaxel-capecitabine     | 1 (4.5)           |                            |                   |                            |                  |

|                               |                      |                               |                         |                               |                          |                               |                      |
|-------------------------------|----------------------|-------------------------------|-------------------------|-------------------------------|--------------------------|-------------------------------|----------------------|
| DA                            | 1 (2.3)              |                               |                         | Gemcitabine-<br>cisplatin     | 1 (4.5)                  |                               |                      |
| Docetaxel-<br>capecitabine    | 2 (4.7)              |                               |                         | Gemcitabine-<br>capecitabine  | 1 (4.5)                  |                               |                      |
| Capecitabine-<br>cisplatin    | 1 (2.3)              |                               |                         | Capecitabine-<br>vinorelbine  | 1 (4.5)                  |                               |                      |
| Doxorubicin-<br>paclitaxel    | 1 (2.3)              |                               |                         | OLF                           | 1 (4.5)                  |                               |                      |
| Doxifluridine PO              | 1 (2.3)              |                               |                         |                               |                          |                               |                      |
| UFT                           | 1 (2.3)              |                               |                         |                               |                          |                               |                      |
| Not assessed                  | 1 (2.3)              |                               |                         |                               |                          |                               |                      |
| Median PFS<br>(months, range) | 4.92 (0.3-<br>19.53) | Median PFS<br>(months, range) | 3.90<br>(0.23-<br>8.53) | Median PFS<br>(months, range) | 6.33<br>(0.67-<br>17.97) | Median PFS<br>(months, range) | 4.23 (0.97-<br>8.17) |
| <b>Unknown period</b>         | <b>5 (11.6)</b>      | <b>Unknown<br/>period</b>     | <b>1 (3.1)</b>          | <b>Unknown<br/>period</b>     | <b>1 (4.5)</b>           |                               |                      |
| Capecitabine                  | 2 (4.7)              | Docetaxel                     | 1 (3.1)                 | Gemcitabine                   | 1 (4.5)                  |                               |                      |
| CAF/FAC                       | 1 (2.3)              |                               |                         |                               |                          |                               |                      |
| Gemcitabine-<br>vinorelbine   | 1 (2.3)              |                               |                         |                               |                          |                               |                      |
| Not assessed                  | 1 (2.3)              |                               |                         |                               |                          |                               |                      |

Values are presented as number (%). CAF, cyclophosphamide+doxorubicin+5-fluorouracil; CMF, cyclophosphamide+methotrexate+5-fluorouracil; FAC, 5-fluorouracil+doxorubicin+cyclophosphamide; PFS, progression-free survival; PO, per oral; T-DM1, trastuzumab-emtansine; UFT, uracil-tegafur.
